# Supplementary material for: Simultaneous fecal microbial and metabolite profiling enables accurate classification of pediatric irritable bowel syndrome
Source: PubMed Central journal article supplement (PMC4675077; doi:10.1186/s40168-015-0139-9), 2015-12-09
Supplement: 40168_2015_139_MOESM3_ESM.pdf [file 40168_2015_139_MOESM3_ESM.pdf]

This table shows the class assignment probabilities for each sample obtained in PLS-DA models

| Sample | Microbial genera |           | NMR metabolites |           |
|--------|------------------|-----------|-----------------|-----------|
|        | kIBS prob        | kHLT prob | kIBS prob       | kHLT prob |
| kIBS01 | 0.17             | 0.83      | 0.68            | 0.32      |
| kIBS02 | 0.99             | 0.01      | 0.48            | 0.52      |
| kIBS03 | 0.66             | 0.34      | 0.10            | 0.90      |
| kIBS04 | 1.00             | 0.00      | 0.85            | 0.15      |
| kIBS05 | 0.69             | 0.31      | 0.59            | 0.41      |
| kIBS06 | 0.95             | 0.05      | 0.60            | 0.40      |
| kIBS07 | 1.00             | 0.00      | 0.75            | 0.25      |
| kIBS08 | 0.49             | 0.51      | 0.76            | 0.24      |
| kIBS09 | 0.12             | 0.88      | 0.47            | 0.53      |
| kIBS10 | 0.73             | 0.27      | 0.46            | 0.54      |
| kIBS11 | 0.28             | 0.72      | 0.84            | 0.16      |
| kIBS12 | 0.98             | 0.02      | 0.71            | 0.29      |
| kIBS13 | 0.38             | 0.62      | 0.88            | 0.12      |
| kIBS14 | 0.26             | 0.74      | 0.70            | 0.30      |
| kIBS15 | 0.99             | 0.01      | 0.80            | 0.20      |
| kIBS16 | 0.96             | 0.04      | 0.70            | 0.30      |
| kIBS17 | 1.00             | 0.00      | 0.41            | 0.59      |
| kIBS18 | 0.97             | 0.03      | 0.88            | 0.12      |
| kIBS19 | 0.55             | 0.45      | 0.78            | 0.22      |
| kIBS20 | 0.99             | 0.01      | 0.81            | 0.19      |
| kIBS21 | 0.99             | 0.01      | 0.84            | 0.16      |
| kIBS22 | 0.99             | 0.01      | 0.69            | 0.31      |
| kHLT01 | 0.19             | 0.81      | 0.35            | 0.65      |
| kHLT02 | 0.06             | 0.94      | 0.01            | 0.99      |
| kHLT03 | 0.57             | 0.43      | 0.28            | 0.72      |
| kHLT04 | 0.22             | 0.78      | 0.88            | 0.12      |
| kHLT05 | 0.25             | 0.75      | 0.88            | 0.12      |
| kHLT06 | 0.07             | 0.93      | 0.12            | 0.88      |
| kHLT07 | 0.18             | 0.82      | 0.00            | 1.00      |
| kHLT08 | 0.11             | 0.89      | 0.06            | 0.94      |
| kHLT09 | 0.58             | 0.42      | 0.13            | 0.87      |
| kHLT10 | 0.18             | 0.82      | 0.18            | 0.82      |
| kHLT11 | 0.20             | 0.80      | 0.11            | 0.89      |
| kHLT12 | 0.30             | 0.70      | 0.27            | 0.73      |
| kHLT13 | 0.07             | 0.93      | 0.35            | 0.65      |
| kHLT14 | 0.39             | 0.61      | 0.36            | 0.64      |
| kHLT15 | 0.11             | 0.89      | 0.06            | 0.94      |
| kHLT16 | 0.16             | 0.84      | 0.55            | 0.45      |
| kHLT17 | 0.30             | 0.70      | 0.34            | 0.66      |
| kHLT18 | 0.08             | 0.92      | 0.21            | 0.79      |
| kHLT19 | 0.84             | 0.16      | 0.33            | 0.67      |
| kHLT20 | 0.07             | 0.93      | 0.19            | 0.81      |
| kHLT21 | 0.27             | 0.73      | 0.41            | 0.59      |
| kHLT22 | 0.29             | 0.71      | 0.19            | 0.81      |

| Microbial phylotypes |           | NMR bins  |           |
|----------------------|-----------|-----------|-----------|
| kIBS prob            | kHLT prob | kIBS prob | kHLT prob |
| 0.66                 | 0.34      | 0.99      | 0.01      |
| 0.56                 | 0.44      | 0.62      | 0.38      |
| 0.91                 | 0.09      | 0.39      | 0.61      |
| 0.99                 | 0.01      | 0.17      | 0.83      |
| 0.50                 | 0.50      | 0.60      | 0.40      |
| 0.48                 | 0.52      | 0.62      | 0.38      |
| 0.98                 | 0.02      | 0.57      | 0.43      |
| 0.47                 | 0.53      | 0.95      | 0.05      |
| 0.54                 | 0.46      | 0.61      | 0.39      |
| 0.34                 | 0.66      | 0.63      | 0.37      |
| 0.47                 | 0.53      | 0.67      | 0.33      |
| 0.72                 | 0.28      | 0.59      | 0.41      |
| 0.65                 | 0.35      | 0.96      | 0.04      |
| 0.25                 | 0.75      | 0.76      | 0.24      |
| 0.78                 | 0.22      | 0.45      | 0.55      |
| 0.76                 | 0.24      | 0.63      | 0.37      |
| 0.99                 | 0.01      | 0.55      | 0.45      |
| 0.97                 | 0.03      | 0.96      | 0.04      |
| 0.51                 | 0.49      | 0.59      | 0.41      |
| 0.70                 | 0.30      | 0.98      | 0.02      |
| 0.75                 | 0.25      | 0.55      | 0.45      |
| 0.94                 | 0.06      | 0.80      | 0.20      |
| 0.28                 | 0.72      | 0.25      | 0.75      |
| 0.04                 | 0.96      | 0.05      | 0.95      |
| 0.27                 | 0.73      | 0.20      | 0.80      |
| 0.37                 | 0.63      | 0.15      | 0.85      |
| 0.84                 | 0.16      | 0.84      | 0.16      |
| 0.03                 | 0.97      | 0.06      | 0.94      |
| 0.31                 | 0.69      | 0.28      | 0.72      |
| 0.24                 | 0.76      | 0.19      | 0.81      |
| 0.19                 | 0.81      | 0.09      | 0.91      |
| 0.15                 | 0.85      | 0.13      | 0.87      |
| 0.46                 | 0.54      | 0.43      | 0.57      |
| 0.43                 | 0.57      | 0.65      | 0.35      |
| 0.26                 | 0.74      | 0.15      | 0.85      |
| 0.51                 | 0.49      | 0.31      | 0.69      |
| 0.24                 | 0.76      | 0.16      | 0.84      |
| 0.10                 | 0.90      | 0.68      | 0.32      |
| 0.45                 | 0.55      | 0.25      | 0.75      |
| 0.04                 | 0.96      | 0.15      | 0.85      |
| 0.91                 | 0.09      | 0.95      | 0.05      |
| 0.13                 | 0.87      | 0.19      | 0.81      |
| 0.08                 | 0.92      | 0.26      | 0.74      |
| 0.17                 | 0.83      | 0.20      | 0.80      |
