# Supplementary material for: Simultaneous fecal microbial and metabolite profiling enables accurate classification of pediatric irritable bowel syndrome
Source: PubMed Central journal article supplement (PMC4675077; doi:10.1186/s40168-015-0139-9), 2015-12-09
Supplement: 40168_2015_139_MOESM5_ESM.pdf [file 40168_2015_139_MOESM5_ESM.pdf]

| Genera              | Weights | Weights |
|---------------------|---------|---------|
| Parasporobacterium  | 0.300   | 0.300   |
| Oxalobacter         | 0.219   | 0.219   |
| Enterobacter        | 0.200   | 0.200   |
| Garciella           | -0.193  | 0.193   |
| Gemella             | 0.191   | 0.191   |
| Staphylococcus      | 0.188   | 0.188   |
| Alistipes           | -0.186  | 0.186   |
| Dorea               | 0.182   | 0.182   |
| Fusibacter          | -0.179  | 0.179   |
| Solobacterium       | 0.175   | 0.175   |
| Prevotella          | 0.171   | 0.171   |
| Bradyrhizobium      | 0.170   | 0.170   |
| Anaerotruncus       | -0.169  | 0.169   |
| Dehalobacter        | -0.166  | 0.166   |
| Acidaminobacter     | -0.163  | 0.163   |
| Camnicella          | -0.151  | 0.151   |
| Acetivibrio         | -0.147  | 0.147   |
| Bifidobacterium     | -0.146  | 0.146   |
| Veillonella         | 0.146   | 0.146   |
| Lactococcus         | -0.146  | 0.146   |
| Brachybacterium     | 0.143   | 0.143   |
| Anaerofilum         | -0.143  | 0.143   |
| Klebsiella          | 0.141   | 0.141   |
| Anaerofustis        | 0.140   | 0.140   |
| Megasphaera         | 0.138   | 0.138   |
| Anaerosinus         | -0.137  | 0.137   |
| Anaerovorax         | -0.135  | 0.135   |
| Desulfovibrio       | -0.133  | 0.133   |
| Mitsuokella         | 0.130   | 0.130   |
| Peptococcus         | -0.130  | 0.130   |
| Acidaminococcus     | 0.129   | 0.129   |
| Syntrophococcus     | 0.126   | 0.126   |
| Oxobacter           | -0.126  | 0.126   |
| Geopsychrobacter    | -0.124  | 0.124   |
| Turcibacter         | -0.123  | 0.123   |
| Tannerella          | -0.123  | 0.123   |
| Raoultella          | 0.118   | 0.118   |
| Actinomyces         | 0.118   | 0.118   |
| Succiniclasticum    | -0.118  | 0.118   |
| Lactobacillus       | 0.118   | 0.118   |
| Anaerococcus        | -0.118  | 0.118   |
| Escherichia         | 0.116   | 0.116   |
| Pelotomaculum       | -0.114  | 0.114   |
| Mogibacterium       | 0.114   | 0.114   |
| Acetanaerobacterium | -0.114  | 0.114   |
| Ruminococcus        | 0.114   | 0.114   |
| Succinivibrio       | 0.112   | 0.112   |
| Verrucomicrobium    | -0.111  | 0.111   |
| Allisonella         | 0.108   | 0.108   |
| Lachnobacterium     | -0.107  | 0.107   |
| Mahella             | 0.106   | 0.106   |

| Metabolites   | Weights | Weights |
|---------------|---------|---------|
| Formate       | 0.555   | 0.555   |
| Pyruvate      | -0.441  | 0.441   |
| Glucose       | 0.408   | 0.408   |
| Lysine        | 0.402   | 0.402   |
| Tyrosine      | 0.401   | 0.401   |
| Methylamine   | 0.366   | 0.366   |
| Leucine       | 0.304   | 0.304   |
| Lactate       | 0.255   | 0.255   |
| Valine        | 0.241   | 0.241   |
| Fumarate      | 0.227   | 0.227   |
| Alanine       | 0.213   | 0.213   |
| Acetate       | -0.207  | 0.207   |
| Succinate     | 0.133   | 0.133   |
| Butyrate      | 0.073   | 0.073   |
| Propionate    | -0.042  | 0.042   |
| Valerate      | -0.024  | 0.024   |
| Dimethylamine | 0.021   | 0.021   |
| Cholate-BA    | 0.014   | 0.014   |
| Isoleucine    | 0.014   | 0.014   |

Only variables with non-zero weights are shown

| Genera                | Weights | Weights |
|-----------------------|---------|---------|
| Catenibacterium       | 0.105   | 0.105   |
| Terasakiella          | -0.103  | 0.103   |
| Rothia                | 0.103   | 0.103   |
| Shigella              | 0.100   | 0.100   |
| Roseburia             | 0.100   | 0.100   |
| Peptostreptococcus    | 0.097   | 0.097   |
| Brachyspira           | -0.097  | 0.097   |
| Ralstonia             | 0.096   | 0.096   |
| Kerstersia            | 0.096   | 0.096   |
| Rhodanobacter         | 0.096   | 0.096   |
| Bulleidia             | 0.096   | 0.096   |
| Fusobacterium         | 0.096   | 0.096   |
| Paucimonas            | 0.093   | 0.093   |
| Clostridium           | -0.091  | 0.091   |
| Bryantella            | 0.089   | 0.089   |
| Collinsella           | 0.086   | 0.086   |
| Coprobacillus         | 0.085   | 0.085   |
| Roseospirillum        | -0.083  | 0.083   |
| Lachnospira           | -0.082  | 0.082   |
| Butyrivibrio          | 0.081   | 0.081   |
| Leptospira            | 0.078   | 0.078   |
| Yersinia              | 0.076   | 0.076   |
| Streptococcus         | 0.076   | 0.076   |
| Phascolarctobacterium | 0.074   | 0.074   |
| Parvimonas            | 0.072   | 0.072   |
| Campylobacter         | 0.064   | 0.064   |
| Anaerostipes          | 0.064   | 0.064   |
| Corynebacterium       | 0.058   | 0.058   |
| Holdemania            | -0.056  | 0.056   |
| Papillibacter         | 0.055   | 0.055   |
| Caloranaerobacter     | -0.055  | 0.055   |
| Rikenella             | -0.052  | 0.052   |
| Dialister             | 0.048   | 0.048   |
| Enterococcus          | -0.048  | 0.048   |
| Eubacterium           | 0.044   | 0.044   |
| Limnobacter           | -0.037  | 0.037   |
| Oribacterium          | 0.034   | 0.034   |
| Slackia               | -0.034  | 0.034   |
| Anaerophaga           | -0.034  | 0.034   |
| Faecalibacterium      | 0.032   | 0.032   |
| Herbaspirillum        | -0.032  | 0.032   |
| Sporobacter           | -0.029  | 0.029   |
| Coproccoccus          | -0.023  | 0.023   |
| Acinetobacter         | -0.019  | 0.019   |
| Mesorhizobium         | -0.019  | 0.019   |
| Bacteroides           | -0.018  | 0.018   |
| Victivallis           | -0.017  | 0.017   |
| Subdoligranulum       | -0.015  | 0.015   |
| Haemophilus           | 0.015   | 0.015   |
| Eggerthella           | -0.014  | 0.014   |
| Sutterella            | 0.002   | 0.002   |
